# Supplementary material for: Assembling of Metal-Polymer Nanocomposites in Irradiated Solutions of 1-Vinyl-1,2,4-triazole and Au(III) Ions: Features of Polymerization and Nanoparticles Formation
Source: MDPI journal article supplement (doi:10.3390/polym14214601), 2022-10-29
Supplement: s1 [file s1]

# Assembling of Metal-Polymer Nanocomposites in Irradiated Solutions of 1-Vinyl-1,2,4-triazole and Au(III) Ions: Features of Polymerization and Nanoparticles Formation

Alexey A. Zharikov<sup>1</sup>, Elena A. Zezina<sup>1</sup>, Rodion A. Vinogradov<sup>1</sup>, Alexander S. Pozdnyakov<sup>2</sup>, Vladimir I. Feldman<sup>1</sup>, Sergey N. Chvalun<sup>3,\*</sup>, Alexander L. Vasiliev<sup>4</sup> and Alexey A. Zezin<sup>1,3</sup>

<sup>1</sup> Department of Chemistry, Lomonosov Moscow State University, 119991, Moscow, Russia

<sup>2</sup> Favorsky Irkutsk Institute of Chemistry, Siberian Branch of the Russian Academy of Sciences, Favorsky st., 1, 664033, Irkutsk, Russia

<sup>3</sup> Enikolopov Institute of Synthetic Polymeric Materials, Russian Academy of Sciences, 70, Profsoyuznaya st., 70, 117393, Moscow, Russia

<sup>4</sup> Moscow Institute of Physics and Technology (National Research University), 141701, Dolgoprudny, Moscow Region, Russia

\* s-chvalun@yandex.ru.

## Supplementary Materials

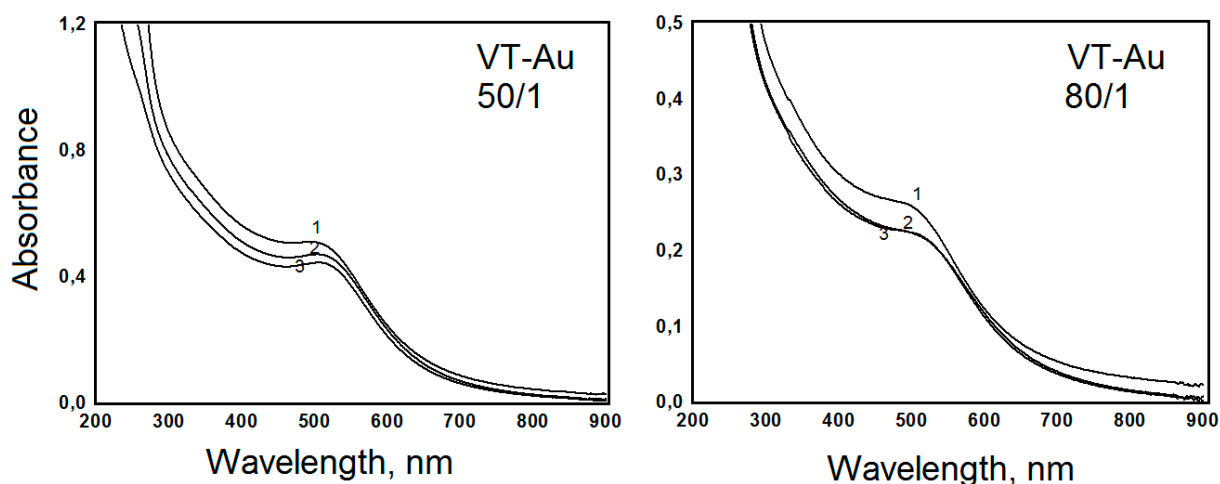

**Figure S1.** The UV-VIS spectra of irradiated at pH 5.5 VT-Au(III) solutions (1 - the spectrum was recorded immediately after irradiation) and the spectra of Au-colloids after 15 hours (curve 2) and 5 days (curve 3).
